# Supplementary material for: An electrochemical technique for controlled dissolution of zirconium based components of light water reactors
Source: Royal Society of Chemistry journal article supplement (doi:10.1039/c8ra08693a), 2019-01-01
Supplement: c8ra08693a1.pdf [file c8ra08693a1.pdf]

Supporting information for:

## An Electrochemical Technique for Controlled Dissolution of Zirconium Based Components of Light Water Reactors

Sayandev Chatterjee,<sup>\*,†</sup> Meghan S Fujimoto,<sup>†</sup> Nathan L Canfield,<sup>†</sup> Monte R Elmore,<sup>†</sup> Devin W Olson,<sup>†</sup> Edgar C Buck,<sup>†</sup> Michele A Conroy,<sup>†</sup> Tamas Varga<sup>‡</sup> and David J Senor<sup>†</sup>

<sup>†</sup>Energy and Environment Directorate, Pacific Northwest National Laboratory, Richland, Washington 99352, United States; email: [Sayandev.Chatterjee@pnl.gov](mailto:Sayandev.Chatterjee@pnl.gov)

<sup>‡</sup>Environmental Molecular Sciences Laboratory, Pacific Northwest National Laboratory, Richland, Washington 99352, United States

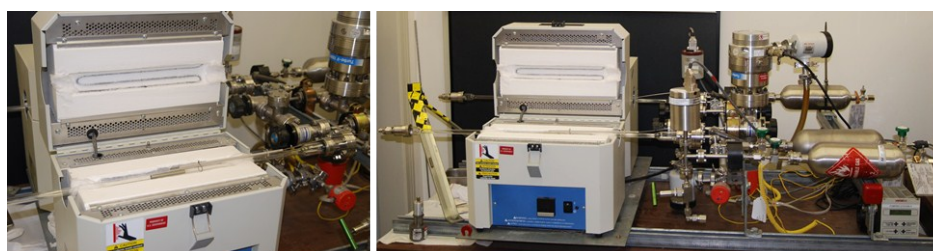

**Figure S1.** Instrumentation of the tube furnace assembly for loading the liner with specified amounts of H/D.

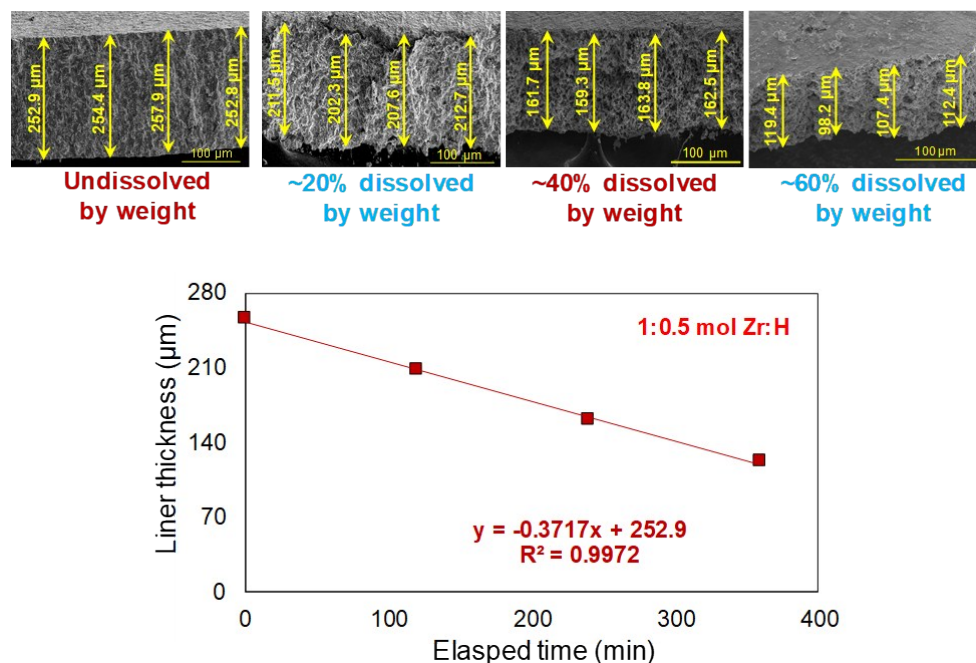

**Figure S2.** Dissolution kinetics of H-loaded liner (1:0.5 mol Zr:H) measured by liner thickness changes with time at a constant applied potential (225 mV vs Ag/AgCl) in 1 M aqueous KCl: (Top panels) Cross-sectional images of liner upon progressive dissolution, (bottom panel) Dissolution kinetics of the liner measured by liner thickness changes with time.

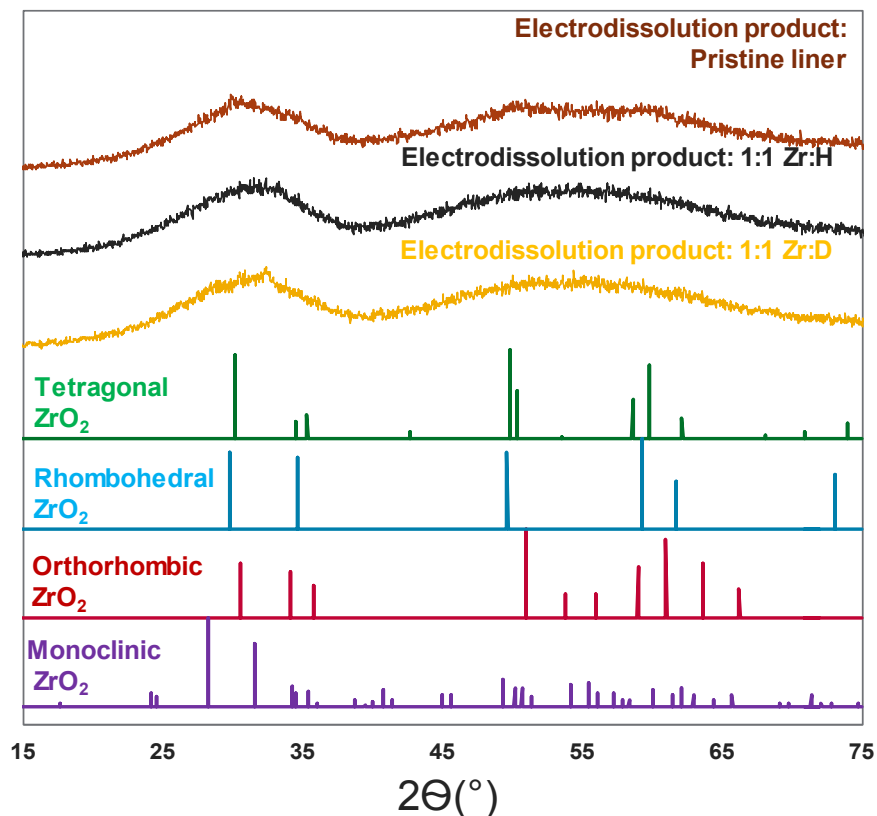

**Figure S3.** Comparison of experimental XRD patterns with those obtained from literature!: (top, brown trace) Product obtained from electrodissoolution of pristine Zr-4 liner, (second from the top, black trace) Product obtained from electrodissoolution of H-loaded Zr-4 liner (1: 1 mol Zr:H), (third from the top, yellow trace) Product obtained from electrodissoolution of D-loaded Zr-4 liner (1: 1 mol Zr:D), (fourth from the top, green trace) tetragonal ZrO<sub>2</sub> from literature (#00-017-0923),<sup>2-3</sup> (third from the bottom, blue trace) rhombohedral ZrO<sub>2</sub> from literature (#00-037-0031),<sup>4</sup> (second from the bottom, red trace) orthorhombic ZrO<sub>2</sub> from literature (#00-034-1084),<sup>5</sup> (bottom, violet trace) monoclinic ZrO<sub>2</sub> from literature (#00-013-0307).<sup>6</sup>

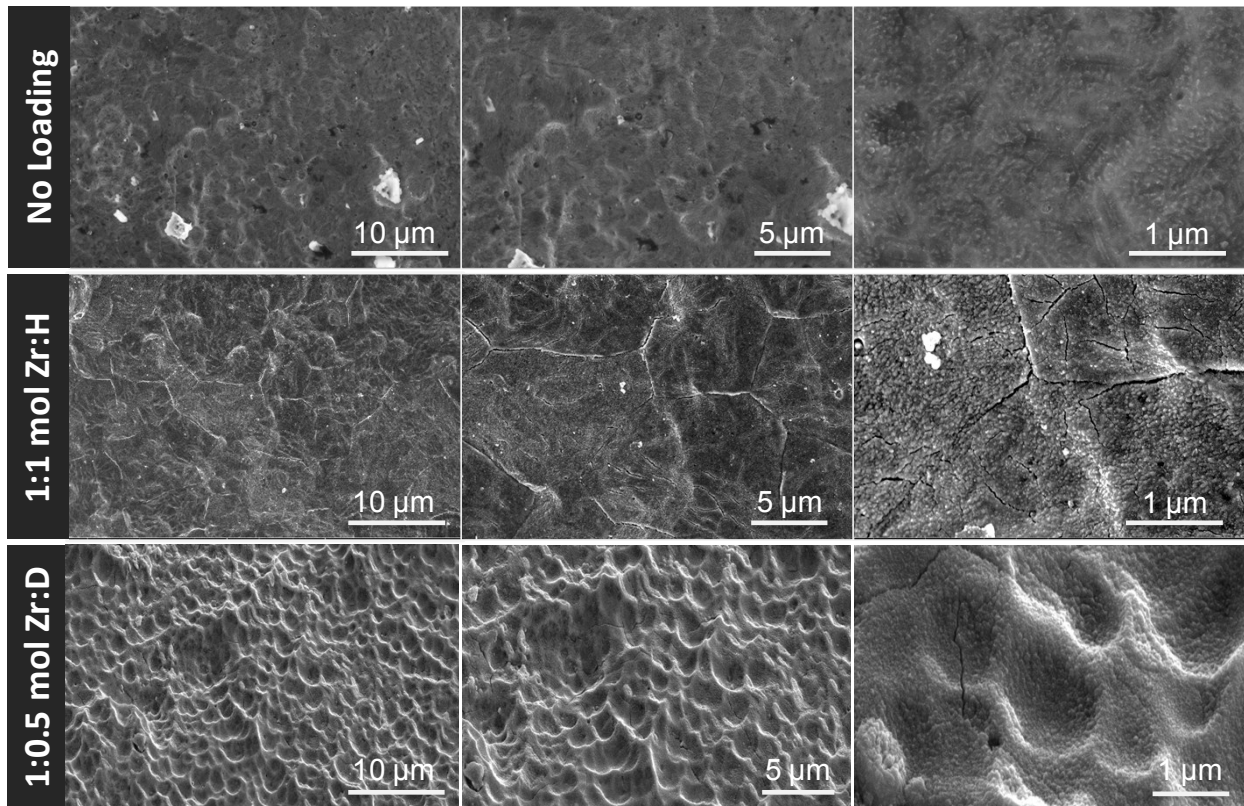

**Figure S4.** Representative secondary electron SEM images of Zr-4 liners prior to electrodisolution at different magnifications: (top row) unloaded lines, (middle row) H-loaded liners 1:1 mol Zr:H, (bottom row) D-loaded liners 1:1 mol Zr:D

#### References:

1. Kabekkodu, S., *Powder Diffraction File Inorganic and Organic Data Book*. International Center for Diffraction Data: Newtown Square, PA, USA, 2015; Vol. 60.
2. Howard, C. J.; Hill, R. J.; Reichert, B. E., Structures of the ZrO<sub>2</sub> Polymorphs at Room-Temperature by High-Resolution Neutron Powder Diffraction. *Acta Crystallogr B* **1988**, *44*, 116-120.
3. Teufer, G., Crystal Structure of Tetragonal ZrO<sub>2</sub>. *Acta Crystallogr* **1962**, *15* (Nov), 1187-+.
4. Hasegawa, H., Rhombohedral Phase Produced in Abraded Surfaces of Partially Stabilized Zirconia (Psz). *J Mater Sci Lett* **1983**, *2* (3), 91-93.
5. Lityagina, L. M.; Kabalkina, S. S.; Pashkina, T. A.; Khozyainov, A. I., Polymorphism of ZrO<sub>2</sub> at High-Pressure. *Fiz Tverd Tela+* **1978**, *20* (11), 3475-3477.
6. Garvie, R. C., Phase Analysis in Zirconia Systems. *J Am Ceram Soc* **1972**, *55* (6), 303-&.
